# Supplementary material for: Transcriptomic Analysis of Mature Transgenic Poplar Expressing the Transcription Factor JERF36 Gene in Two Different Environments
Source: Front Bioeng Biotechnol. 2022 Jun 14;10:929681. doi: 10.3389/fbioe.2022.929681 (PMC9237257; doi:10.3389/fbioe.2022.929681)
Supplement: Supplementary file 1 [file Table3.XLSX]

## Sheet: Sheet1
Table S3 KEGG annoation of DEGs with JERF-binding cis-elements in their promoter regions in compare of ABJ01 and 9# at Daqing
GeneID	cis element in promoter			log2Ratio(DA/DB)	KEGG annoation
					Pathway	K ID	Description
Potri.005G009100	GCC-box			2.48573	Plant-pathogen interaction	K13457	disease resistance protein RPM1
Potri.013G015700		DREB		1.09547	Plant-pathogen interaction	K13459	disease resistance protein RPS2
Potri.018G136700		DREB		1.38585	Plant-pathogen interaction	K13459	disease resistance protein RPS2
Potri.005G041300		DREB		-1.11449	Plant-pathogen interaction	K13459	disease resistance protein RPS2
Potri.005G217000	GCC-box	DREB		-1.82769	Plant-pathogen interaction	K15397	3-ketoacyl-CoA synthase
Potri.T032800		DREB		-2.13789	Plant-pathogen interaction	K13420	LRR receptor-like serine/threonine-protein kinase FLS2
Potri.010G020600		DREB		4.66494	Biosynthesis of secondary metabolites	K13832	3-dehydroquinate dehydratase / shikimate dehydrogenase
Potri.017G103700		DREB		5.98524	Biosynthesis of secondary metabolites	K07513	acetyl-CoA acyltransferase 1
Potri.T121900		DREB		1.91724	Biosynthesis of secondary metabolites	K01738	cysteine synthase A
Potri.001G388800		DREB		-6.03423	Biosynthesis of secondary metabolites	K00422	polyphenol oxidase
Potri.011G150300		DREB		-1.16832	Biosynthesis of secondary metabolites	K05278	flavonol synthase
Potri.019G028200	GCC-box			6.17777	Photosynthesis	K02709	photosystem II PsbH protein
Potri.013G143200		DREB		-3.20907	Photosynthesis	K02703	photosystem II P680 reaction center D1 protein
Potri.013G075000		DREB		-3.53105	Oxidative phosphorylation	K05580	NAD(P)H-quinone oxidoreductase subunit I
Potri.001G222100		DREB		1.07983	RNA transport	K14297	nuclear pore complex protein Nup98-Nup96
Potri.001G294500		DREB		4.63887		-
Potri.001G364400		DREB		1.57093	ABC transporters/Phosphotransferase system (PTS)	K14709	solute carrier family 39 (zinc transporter), member 1/2/3
Potri.001G422500		DREB		3.58694		K07437	cytochrome P450, family 26, subfamily A
Potri.004G170100	GCC-box			4.76127		K19613	leucine-rich repeat protein SHOC2
Potri.005G046800		DREB		1.59605		-
Potri.005G069900	GCC-box		ABRE	3.0197		-
Potri.006G022600		DREB		1.14214	Cyanoamino acid metabolism	K13030	cyanohydrin beta-glucosyltransferase
						K13493	cytokinin-N-glucosyltransferas
						K13228	UDP-glucosyltransferase BX9
Potri.006G172100		DREB		1.11653		K05387	glutamate receptor, ionotropic, plant
Potri.006G226400	GCC-box			1.378		-
Potri.008G167700		DREB		1.06088		-
Potri.010G252200	GCC-box			1.59229	Circadian rhythm - plant	K12115	clock-associated PAS protein ZTL
						K12116	flavin-binding kelch repeat F-box protein 1
Potri.011G064000	GCC-box			1.19156	Glycolysis / Gluconeogenesis	K01568	pyruvate decarboxylase
Potri.014G005400		DREB		1.02659		K19613	leucine-rich repeat protein SHOC2
						K15078	structure-specific endonuclease subunit SLX1
Potri.014G018200		DREB		1.12728	Linoleic acid metabolism	K00454	lipoxygenase
Potri.014G198300		DREB		5.78013		K15191	La-related protein 7
						K10615	E3 ubiquitin-protein ligase HERC4
Potri.016G108600			ABRE	4.81613		-
Potri.017G004800	GCC-box	DREB		2.93256		K07119	uncharacterized protein
Potri.019G006100		DREB	ABRE	2.00868		K04733	interleukin-1 receptor-associated kinase 4
Potri.T024200		DREB		4.67009		-
Potri.T063600		DREB		1.47695		K18914	adrenodoxin-NADP+ reductase
Potri.T125100		DREB	ABRE	6.62035	SNARE interactions in vesicular transport	K08493	vesicle transport through interaction with t-SNAREs 1
Potri.T153000	GCC-box	DREB	ABRE	1.74197		-
Potri.001G223800	GCC-box	DREB		-1.70108	Cyanoamino acid metabolism	K01188	beta-glucosidase
Potri.002G011700		DREB		-2.73916		-
Potri.005G032600		DREB		-1.38567	Linoleic acid metabolism	K15718	linoleate 9S-lipoxygenase
Potri.010G060300		DREB		-2.13203		K17609	nucleoredoxin
Potri.015G050700			ABRE	-1.27457		-
Potri.016G021100			ABRE	-6.62326	Cyanoamino acid metabolism	K13030	cyanohydrin beta-glucosyltransferase
						K00699	glucuronosyltransferase
						K13691	pathogen-inducible salicylic acid glucosyltransferase
Potri.016G076600	GCC-box	DREB		-1.06483		-
Potri.016G095300		DREB		-2.14409		-
Potri.017G069000		DREB		-1.71451		-
Potri.018G089300		DREB	ABRE	-1.92488		K17604	zinc finger SWIM domain-containing protein 3
						K10960	geranylgeranyl reductase
						K10396	kinesin family member
					Cyanoamino acid metabolism	K01188	beta-glucosidase
Potri.018G119600		DREB		-2.74826		-
Potri.018G120200		DREB		-1.4158		-
Potri.T118000	GCC-box			-1.05522		K15078	structure-specific endonuclease subunit SLX1
Potri.T136500		DREB		-4.23535		K04733	interleukin-1 receptor-associated kinase 4
Potri.T141000	GCC-box	DREB		-6.92075		-
Potri.T160400		DREB		-1.02299		-
Potri.T165000		DREB		-3.46703		K08738	cytochrome c
