# Supplementary material for: Transcriptomic Analysis of Mature Transgenic Poplar Expressing the Transcription Factor JERF36 Gene in Two Different Environments
Source: Front Bioeng Biotechnol. 2022 Jun 14;10:929681. doi: 10.3389/fbioe.2022.929681 (PMC9237257; doi:10.3389/fbioe.2022.929681)
Supplement: Supplementary file 4 [file Table4.XLSX]

## Sheet: Sheet1
Table S4 KEGG annoation of DEGs with JERF-binding cis-elements in their promoter regions in compare of ABJ01 and 9# at Qiqihar
GeneID	cis element in promoter			log2fold-change(QA/QB)	KEGG Orthology
					Pathway	K ID	Description
Potri.008G207300		DREB		1.3728	Photosynthesis	K02705	photosystem II CP43 chlorophyll apoprotein
Potri.011G113700		DREB		1.19705	Photosynthesis	K02704	photosystem II CP47 chlorophyll apoprotein
Potri.013G138300		DREB		1.40657	Photosynthesis	K02703	photosystem II P680 reaction center D1 protein
Potri.013G141800		DREB		1.9475	Photosynthesis	K02689	photosystem I P700 chlorophyll a apoprotein A1
Potri.013G143200		DREB		3.21934	Photosynthesis	K02703	photosystem II P680 reaction center D1 protein
Potri.016G094200		DREB		1.8248	Photosynthesis	K02634	apocytochrome f
Potri.017G052700		DREB		1.93401	Photosynthesis	K02690	photosystem I P700 chlorophyll a apoprotein A2
Potri.019G028100		DREB		1.74202	Photosynthesis	K02689	photosystem I P700 chlorophyll a apoprotein A1
Potri.T005700		DREB		2.28504	Photosynthesis	K02112	F-type H+-transporting ATPase subunit beta
Potri.T005800		DREB		1.46337	Carbon fixation in photosynthetic organisms	K01601	ribulose-bisphosphate carboxylase large chain
Potri.T006200		DREB		1.41152	Carbon fixation in photosynthetic organisms	K01601	ribulose-bisphosphate carboxylase large chain
Potri.012G062600		DREB		1.30248	Carbon fixation in photosynthetic organisms	K01601	ribulose-bisphosphate carboxylase large chain
Potri.013G140100		DREB		2.79011	Oxidative phosphorylation	K02132	F-type H+-transporting ATPase subunit alpha
Potri.015G051300		DREB		1.46651	Oxidative phosphorylation	K03883	NADH-ubiquinone oxidoreductase chain 5
Potri.011G074300		DREB	ABRE	1.17609	Ribosome	K02886	large subunit ribosomal protein L2
Potri.011G074400		DREB		1.33586	Ribosome	K02886	large subunit ribosomal protein L2
Potri.012G047500		DREB	ABRE	1.0587	Ribosome	K02982	small subunit ribosomal protein S3
Potri.013G136600		DREB		1.34861	Ribosome	K02890	large subunit ribosomal protein L22
Potri.T009400		DREB	ABRE	1.45298	MAPK signaling pathway - plant	K13420	LRR receptor-like serine/threonine-protein kinase FLS2
Potri.004G231700	aGCC-box			-1.31168	MAPK signaling pathway - plant	K13420	LRR receptor-like serine/threonine-protein kinase FLS2
Potri.002G172500		DREB		-1.31452	Plant hormone signal transduction	K14486	auxin response factor
Potri.006G066600		DREB		-1.64455	Plant hormone signal transduction	K14484	auxin-responsive protein IAA
Potri.010G218900		DREB		1.01202	RNA transport	K03231	elongation factor 1-alpha
Potri.001G288100			ABRE	1.01735		-
Potri.001G412500		DREB		1.75949		-
Potri.002G038900		DREB		2.38003		K08176	MFS transporter, PHS family, inorganic phosphate transporter
Potri.002G119300		DREB	ABRE	3.09822		-
Potri.002G132100			ABRE	1.5251		-
Potri.002G150100			ABRE	4.86174		K16084	ent-cassa-12,15-diene 11-hydroxylase
Potri.002G211400	GCC-box			2.1387		-
Potri.002G220500		DREB		1.84082		K11805	WD repeat-containing protein 68
Potri.002G261100		DREB		5.32633		-
Potri.003G209000	aGCC-box	DREB		3.02638		K07393	putative glutathione S-transferase
Potri.004G063000			ABRE	1.02804		K09874	aquaporin NIP
Potri.005G132300	GCC-box	DREB		2.64699		-
Potri.005G132400		DREB		7.6402		-
Potri.005G133000		DREB		1.11034		-
Potri.005G133100	GCC-box	DREB	ABRE	1.23933		-
Potri.005G133300		DREB	ABRE	2.5222		-
Potri.005G133400		DREB		1.76625		-
Potri.005G242800		DREB		3.18194	Metabolic pathways	K00679	phospholipid:diacylglycerol acyltransferase
Potri.008G224300		DREB		1.59012		-
Potri.010G020600		DREB		5.8961	Metabolic pathways	K13832	3-dehydroquinate dehydratase / shikimate dehydrogenase
Potri.010G059600		DREB	ABRE	1.85225		K17609	nucleoredoxin
Potri.010G059800		DREB	ABRE	5.5625		K17609	nucleoredoxin
Potri.010G230700	GCC-box			1.32258		K11252	histone H2B
Potri.011G013700		DREB		4.99601		K19613	leucine-rich repeat protein SHOC2
Potri.011G034200		DREB		1.99639		K04733	interleukin-1 receptor-associated kinase 4
Potri.011G074100		DREB		1.54696		-
Potri.011G075000		DREB		2.1868		K10268	F-box and leucine-rich repeat protein 2/20;
						K02946	small subunit ribosomal protein S10
Potri.011G150300		DREB		1.90326	Metabolic pathways	K05278	flavonol synthase
Potri.011G152000		DREB		4.60644		-
Potri.013G031800	GCC-box	DREB		1.4175		-
Potri.013G046800		DREB		1.16863		-
Potri.013G139200		DREB		2.29498		-
Potri.013G139800		DREB		2.63741		-
Potri.013G139900		DREB		1.51924		-
						K02946	aspartyl-tRNA(Asn)/glutamyl-tRNA(Gln) amidotransferase subunit C
Potri.014G065400	GCC-box		ABRE	1.89243		-
Potri.014G185600	GCC-box	DREB		1.75434		-
Potri.014G185900		DREB	ABRE	1.97396		-
Potri.014G186000		DREB		1.20423		-
Potri.014G186200		DREB		1.62815		-
Potri.014G198300		DREB		3.14586		K15191	La-related protein 7
Potri.015G015700	GCC-box			1.14165		-
Potri.016G131100			ABRE	1.32988		-
Potri.017G034800		DREB		1.63756		-
Potri.017G069000		DREB		3.56074		-
Potri.017G145000		DREB		2.74137		K19613	leucine-rich repeat protein SHOC2;
						K15078	structure-specific endonuclease subunit SLX1
Potri.018G044800		DREB		1.00626		-
Potri.018G130000		DREB		1.15866		K15014	solute carrier family 29 (equilibrative nucleoside transporter), member 1/2/3
Potri.018G151700		DREB		1.00052		K08202	MFS transporter, OCT family, solute carrier family 22 (organic cation transporter), member 4/5
Potri.019G051600		DREB		4.97841		K04733	interleukin-1 receptor-associated kinase 4
Potri.019G065000		DREB		1.05313		-
Potri.019G069900	aGCC-box			4.8066		K19613	leucine-rich repeat protein SHOC2
Potri.019G121600		DREB		1.26109	Endocytosis	K17917	sorting nexin-1/2
Potri.T061700		DREB		6.16974		-
Potri.T120500		DREB		1.86226		-
Potri.T160400		DREB		2.3516		-
Potri.T165000		DREB		2.89973		K08738	cytochrome c
Potri.T167600		DREB		1.56266		-
Potri.001G250400	aGCC-box			-1.01708		-
Potri.001G423500		DREB	ABRE	-1.44591		K03386	peroxiredoxin (alkyl hydroperoxide reductase subunit C)
						K11187	peroxiredoxin 5, atypical 2-Cys peroxiredoxin
Potri.001G441400	aGCC-box	DREB		-1.27136		K04733	interleukin-1 receptor-associated kinase 4
						K04730	interleukin-1 receptor-associated kinase 1
Potri.002G200700		DREB		-2.10703	RNA degradation	K04077	chaperonin GroEL;
						K13484	5-hydroxyisourate hydrolase / 2-oxo-4-hydroxy-4-carboxy-5-ureidoimidazoline decarboxylase
						K06662	cell cycle checkpoint protein
Potri.003G001500			ABRE	-1.33145		K05016	chloride channel 7
Potri.003G041300		DREB		-2.20685		K01534	Cd2+/Zn2+-exporting ATPase
Potri.003G043400		DREB		-1.03357		-
Potri.003G151900		DREB		-3.39551		-
Potri.004G023500		DREB		-5.10513		K04733	interleukin-1 receptor-associated kinase 4
Potri.004G045000	GCC-box			-5.58368		-
Potri.004G139500		DREB		-5.56253	Flavonoid biosynthesis	K05278	flavonol synthase
Potri.004G198400			ABRE	-1.37781		K04499	RuvB-like protein 1 (pontin 52)
Potri.005G135800		DREB		-5.52629	RNA degradation	K04077	chaperonin GroEL;
						K13484	5-hydroxyisourate hydrolase / 2-oxo-4-hydroxy-4-carboxy-5-ureidoimidazoline decarboxylase
						K06662	cell cycle checkpoint protein
Potri.006G243700		DREB		-2.22818	Endocytosis	K12472	epidermal growth factor receptor substrate 15;
						K06699	proteasome activator subunit 4
Potri.008G223000		DREB		-1.13689		K10393	kinesin family member 2/24
Potri.010G017900		DREB		-3.14091		K04730	interleukin-1 receptor-associated kinase 1
						K04733	interleukin-1 receptor-associated kinase 4
Potri.010G018400		DREB		-5.60866		K04730	interleukin-1 receptor-associated kinase 1
						K04733	interleukin-1 receptor-associated kinase 4
Potri.010G060100		DREB		-1.04975		K17609	nucleoredoxin
Potri.011G033300		DREB		-1.38374		K08332	vacuolar protein 8
Potri.011G035300	aGCC-box			-2.59427		K05349	beta-glucosidase
						K04382	serine/threonine-protein phosphatase 2A catalytic subunit
						K04733	interleukin-1 receptor-associated kinase 4
						K03327	multidrug resistance protein, MATE family
Potri.013G101600			ABRE	-2.02195		K08738	cytochrome c
Potri.014G173800	aGCC-box		ABRE	-2.03537		-
Potri.014G181800		DREB		-4.34403	Amino sugar and nucleotide sugar metabolism	K01810	glucose-6-phosphate isomerase
Potri.015G118000			ABRE	-1.37154		K19042	E3 ubiquitin-protein ligase BOI and related proteins
Potri.017G004800	GCC-box	DREB		-3.04856		K07119	uncharacterized protein
Potri.017G103700		DREB		-5.77675	alpha-Linolenic acid metabolism	K07513	acetyl-CoA acyltransferase 1
Potri.018G120200		DREB		-2.98381		-
Potri.018G136800		DREB		-4.69506		K15777	4,5-DOPA dioxygenase extradiol
Potri.018G139900			ABRE	-1.7197		K01537	Ca2+-transporting ATPase
Potri.018G148100	GCC-box			-4.00195	Ribosome biogenesis in eukaryotes	K14554	U3 small nucleolar RNA-associated protein 21
Potri.019G065100		DREB		-2.50393		-
Potri.T052000			ABRE	-1.25053	Plant-pathogen interaction	K13459	disease resistance protein RPS2
Potri.T077400	aGCC-box			-2.50086		K19613	leucine-rich repeat protein SHOC2
Potri.T125100		DREB		-7.31695	SNARE interactions in vesicular transport	K08493	vesicle transport through interaction with t-SNAREs 1
Potri.T136500		DREB		-2.70912		K04733	interleukin-1 receptor-associated kinase 4
